# Supplementary material for: A Portable, Inexpensive, Nonmydriatic Fundus Camera Based on the Raspberry Pi® Computer
Source: J Ophthalmol. 2017 Mar 15;2017:4526243. doi: 10.1155/2017/4526243 (PMC5370517; doi:10.1155/2017/4526243)
Supplement: Supplementary file 2 [file 4526243.f2.xlsx]

## Sheet: Sheet1
Camera parts:
Distributer	Manufacturer	Component	Quantity	Distributer/Manufacturer Part #	Total Price	Note
MCM Electronics	Raspberry Pi	Raspberry Pi 2 Model B 1GB Project Board and 8GB NOOBS Card	1	83-16533	39.99
MCM Electronics	Raspberry Pi	Pi Noir 5MP Raspberry Pi Night Vision Camera Module	1	28-18030	25
MCM Electronics	Adafruit	5'' 800 x 600 LCD Backpack	1	83-16786/2260	70.99
Marubeni	Ushio Epitex Incorporated	SMT47W/850D	1		3
Sensor Medical Technology	Sensor Medical Technology	Single Use 20D Lens (Box of 10)	1/10	SMT 012	13
Amazon	Mogix	External Battery Charger 10400mAh Power Bank	1	B00MFVNLXK	22.99
Amazon	Anker	Anker [6-Pack] Premium 1ft Micro USB Cables	2/6	B00N8VHW72/AK-B7102012	3.33
Amazon	E-Projects	E-Projects - 400 Piece, 16 Value Resistor Kit (10 Ohm - 1M Ohm)	1/400	B00E9Z0OCG	0.024975	One (1) 100-ohm resistor
Amazon	URBEST	328 Pcs Assorted Heat Shrink Tube	2/328	B00W70KOQG	0.5542
Adafruit	Adafruit	Premium Female/Female Jumper Wires - 20 x 6" (150mm)	6/20	1950	0.585
Adafruit	Adafruit	Tactile Switch Buttons (12mm square, 6mm tall) x 10 pack	1/10	1119	0.25
Monoprice	Monoprice	Ultra Slim Series High Speed HDMI Cable, 6-inch	1	13574	5.49
		Solder wire 60/40
		Rubber bands
		Electrical tape
				Total cost of camera:	185.204
Accessories useful for building the camera:
Distributer	Manufacturer	Component	Quantity	Distributer/Manufacturer Part #	Total Price	Note
Amazon	Xuron	Xuron 450 Tweezer Nose Plier	2	B0006N73BU/450	25.06
Amazon	Logitech	Logitech Wireless Combo MK270 with Keyboard and Mouse	1	B00BP5KOPA/920-004536	19.99
Raspberry Pi Swag	Raspberry Pi	Raspberry Pi Universal Power Supply	1	N/A	7.8
Hakko	Hakko	FX-888D Digital Soldering Station	1	FX888D-23BY	107.47
